# Supplementary material for: Inhibitory Effects of Ginsenoside Ro on the Growth of B16F10 Melanoma via Its Metabolites
Source: MDPI journal article supplement (doi:10.3390/molecules24162985), 2019-08-17
Supplement: s1 [file s1]

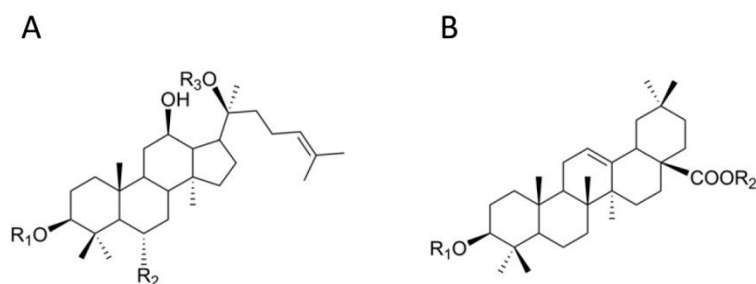

**Figure S1.** The skeleton structures of ginsenosides. (A) PPD-type; (B) OA-type. R1, R2 and R3 are the sites of sugar attachment on the skeleton of ginsenosides. Sugar moieties are listed in Table S1.

**Table S1.** Summary of ginsenoside structures

| Group    | Ginsenoside | Carbohydrate Moieties |     |         |
|----------|-------------|-----------------------|-----|---------|
|          |             | R1                    | R2  | R3      |
| PPD-type | Rb1         | Glc-Glc               | H   | Glc-Glc |
|          | CK          | H                     | H   | Glc     |
| OA-type  | Ro          | GlcUA-Glc             | Glc | -       |
|          | R1          | GlcUA-Glc             | H   | -       |
|          | IVa         | GlcUA                 | Glc | -       |
|          | E           | GlcUA                 | H   | -       |

Glc:  $\beta$ -D-glucopyranosyl; GlcUA:  $\beta$ -D-gulcuronic acid
